# Supplementary material
Source: publisher figshare collection journal article supplement (https://acs.figshare.com/ndownloader/files/3988849)
Supplement: Supplementary file 1 [file 3988849]

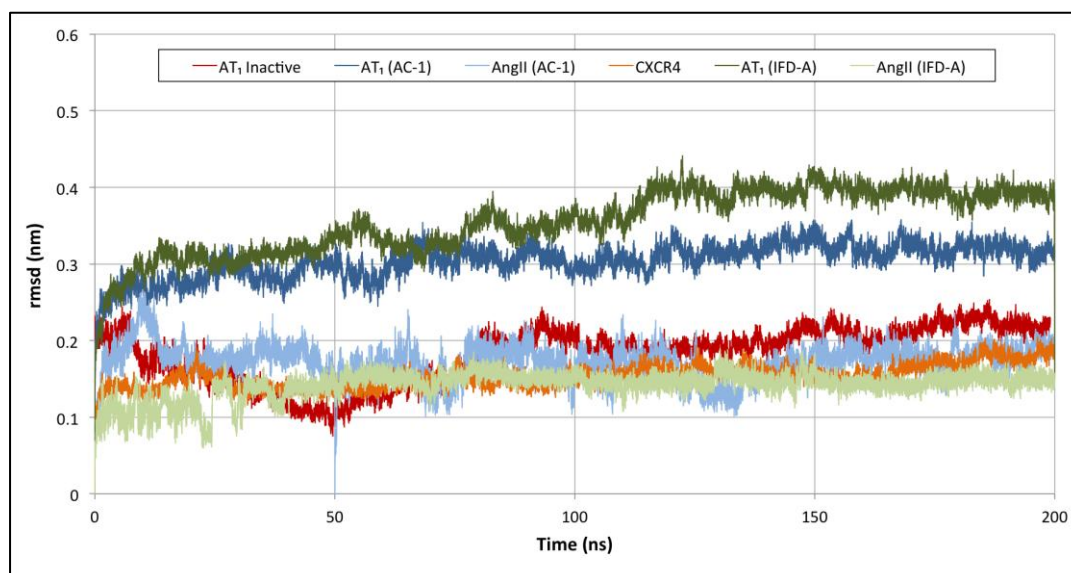

**Figure S3.** Root mean square deviations (rmsd) on AT<sub>1</sub> receptor backbone atoms (dark blue, dark green and red for AC1, IFD-A and the inactive state MD respectively) and on AngII backbone atoms (light blue and light green for AC1 and IFD-A complexes respectively), throughout the MD simulations. CXCR4 backbone atom rmsd, which was used as a control simulation, is shown in orange.
